# Supplementary material for: Off-Target Effect of Activation of NF-κB by HIV Latency Reversal Agents on Transposable Elements Expression
Source: MDPI journal article supplement (doi:10.3390/v14071571), 2022-07-20
Supplement: s1 [file s1]

A

## Ingenol B

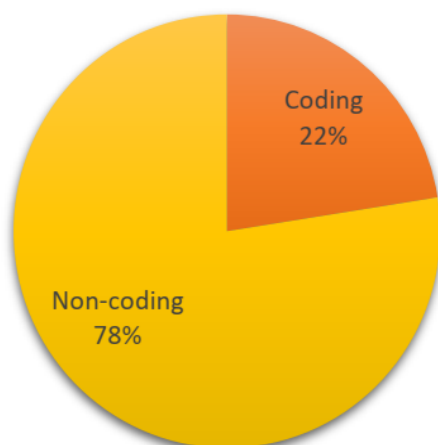

## Bryostatin

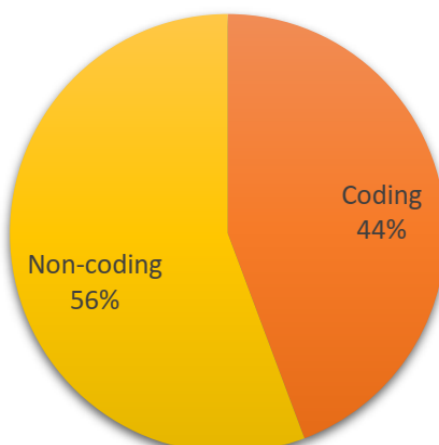

## AZDS581

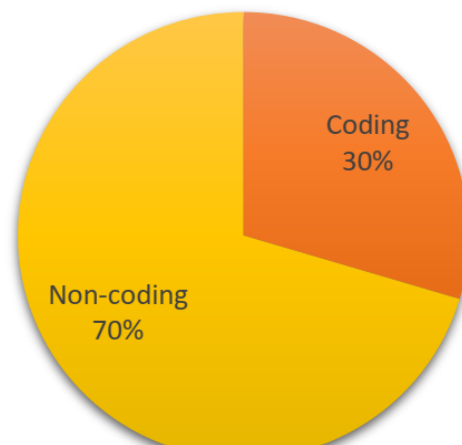

B

## IngenolB

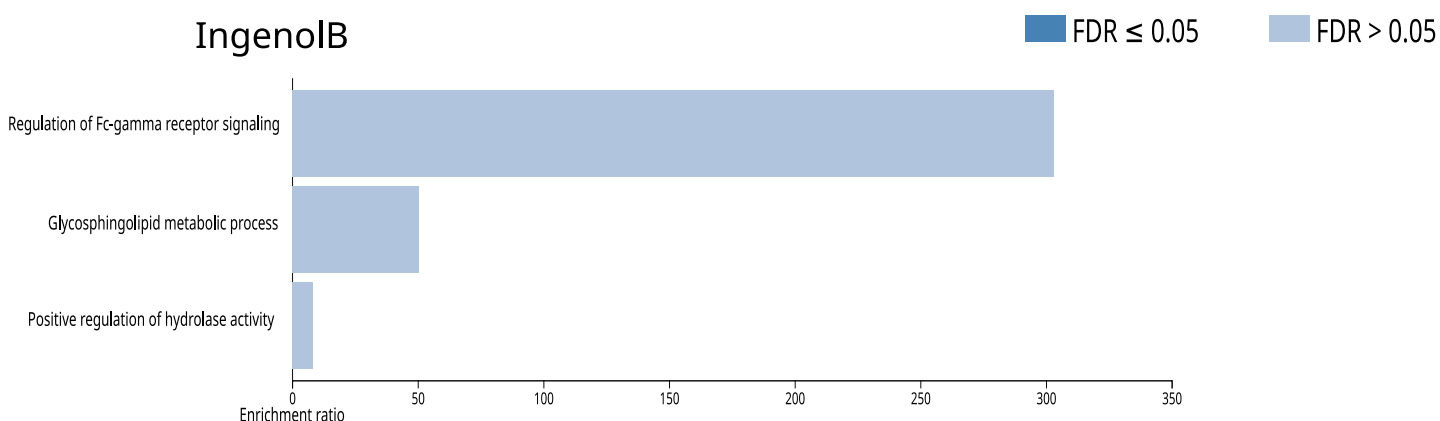

## Bryostatin

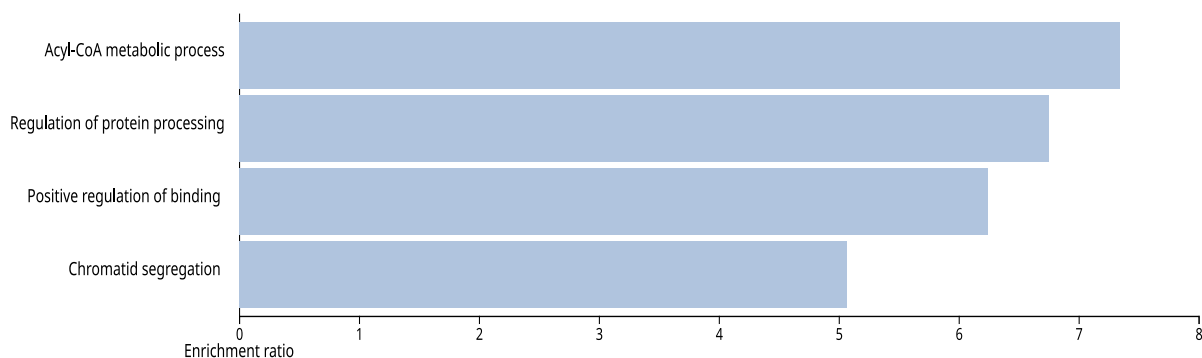

## AZDS581

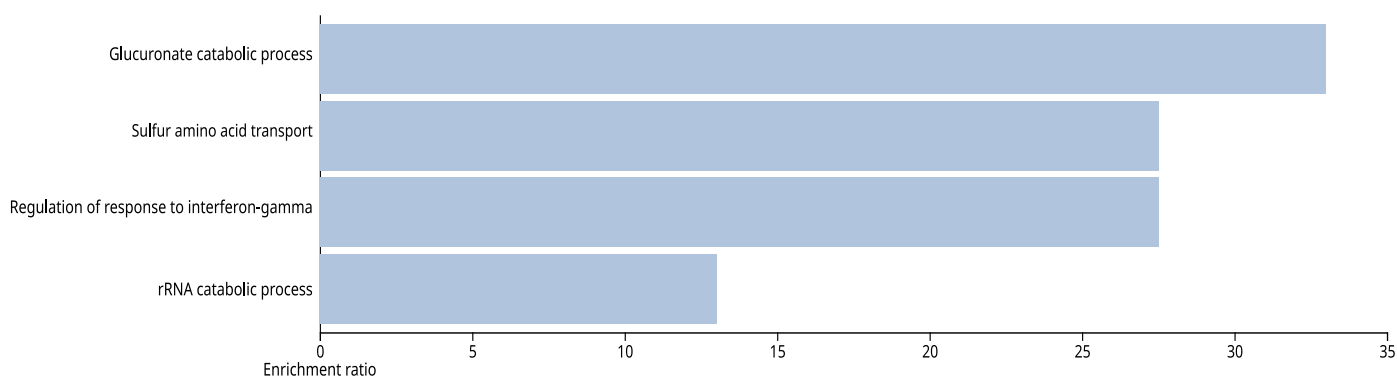

Figure S1. Proportion of coding and noncoding differentially expressed retro elements (A) and enriched neighboring gene analysis (B) for each type of treatment.
